# Supplementary material for: Association of glycemic variability with short and long-term mortality among critically ill trauma patients: A retrospective study from the MIMIC-IV database
Source: Research Square preprint supplement (doi:10.21203/rs.3.rs-7246103/v1), 2025-08-27
Supplement: Supplementary file 1 [file b4147fe3335c631a43b90b05.docx]

**Supplementary Material**

**Table S1 Mediating effects of sepsis and acute kidney injury on the association between glycemic variability and all-cause mortality in critically ill trauma patients**

**Fig. S1 Comparison of the distribution of the Glucose Coefficient of Variation (CV) before and after natural logarithmic transformation**

**Fig. S2 Time-dependent receiver operating characteristic (ROC) curves comparing the predictive discrimination of four nested models for all-cause mortality in critically ill trauma patients**

**Fig. S3 Dose-response association between log(Glucose CV) and mortality in critically ill trauma patients, showing the effect of sequential covariate adjustment**

**Table S1 Mediating effects of sepsis and acute kidney injury on the association between glycemic variability and all-cause mortality in critically ill trauma patients**

| **Mediator** |  | **Total effect (95%CI)** | ***P*** | **ACME (95%CI)** | ***P*** | **ADE (95%CI)** | ***P*** | **Prop. mediated (95%CI)** | ***P*** |  |
| --- | --- | --- | --- | --- | --- | --- | --- | --- | --- | --- |
| ***30-day Mortality*** | | | | | | | | | |  |
| Sepsis |  | 1.82 (1.48 ~ 2.18) | **<0.001** | 1.35 (1.20 ~ 1.55) | **<0.001** | 1.75 (1.40 ~ 2.12) | **<0.001** | 50.7% (29.7% ~ 88.6%) | **<0.001** |  |
| AKI |  | 1.82 (1.51 ~ 2.20) | **<0.001** | 1.27 (1.13 ~ 1.48) | **<0.001** | 1.77 (1.46 ~ 2.14) | **<0.001** | 40.0% (19.5% ~ 73.5%) | **<0.001** |  |
| ***1-year Mortality*** | | | | | | | | | |  |
| Sepsis |  | 1.49 (1.28 ~ 1.75) | **<0.001** | 1.32 (1.21 ~ 1.48) | **<0.001** | 1.43 (1.21 ~ 1.68) | **<0.001** | 70.5% (41.3% ~ 129.5%) | **<0.001** |  |
| AKI |  | 1.49 (1.27 ~ 1.73) | **<0.001** | 1.15 (1.06 ~ 1.27) | **<0.001** | 1.48 (1.25 ~ 1.72) | **<0.001** | 35.7% (14.8% ~ 71.9%) | **<0.001** |  |

HR: Hazard Ratio, CI: Confidence Interval, AKI (acute kidney injury), ACME (average causal mediation effect), ADE (average direct effect).

Adjusted for gender, age, race, vital signs (heart rate, systolic pressure, respiratory rate, body temperature), laboratory tests (hemoglobin, white blood cell count, platelets, creatinine, blood urea nitrogen), comorbidities (diabetes, myocardial infarction, congestive heart failure, cerebrovascular disease, chronic pulmonary disease, renal disease, malignant cancer), and trauma variables (traumatic brain injury, chest/abdominal/spinal/extremity/multiple trauma, trauma mechanism).
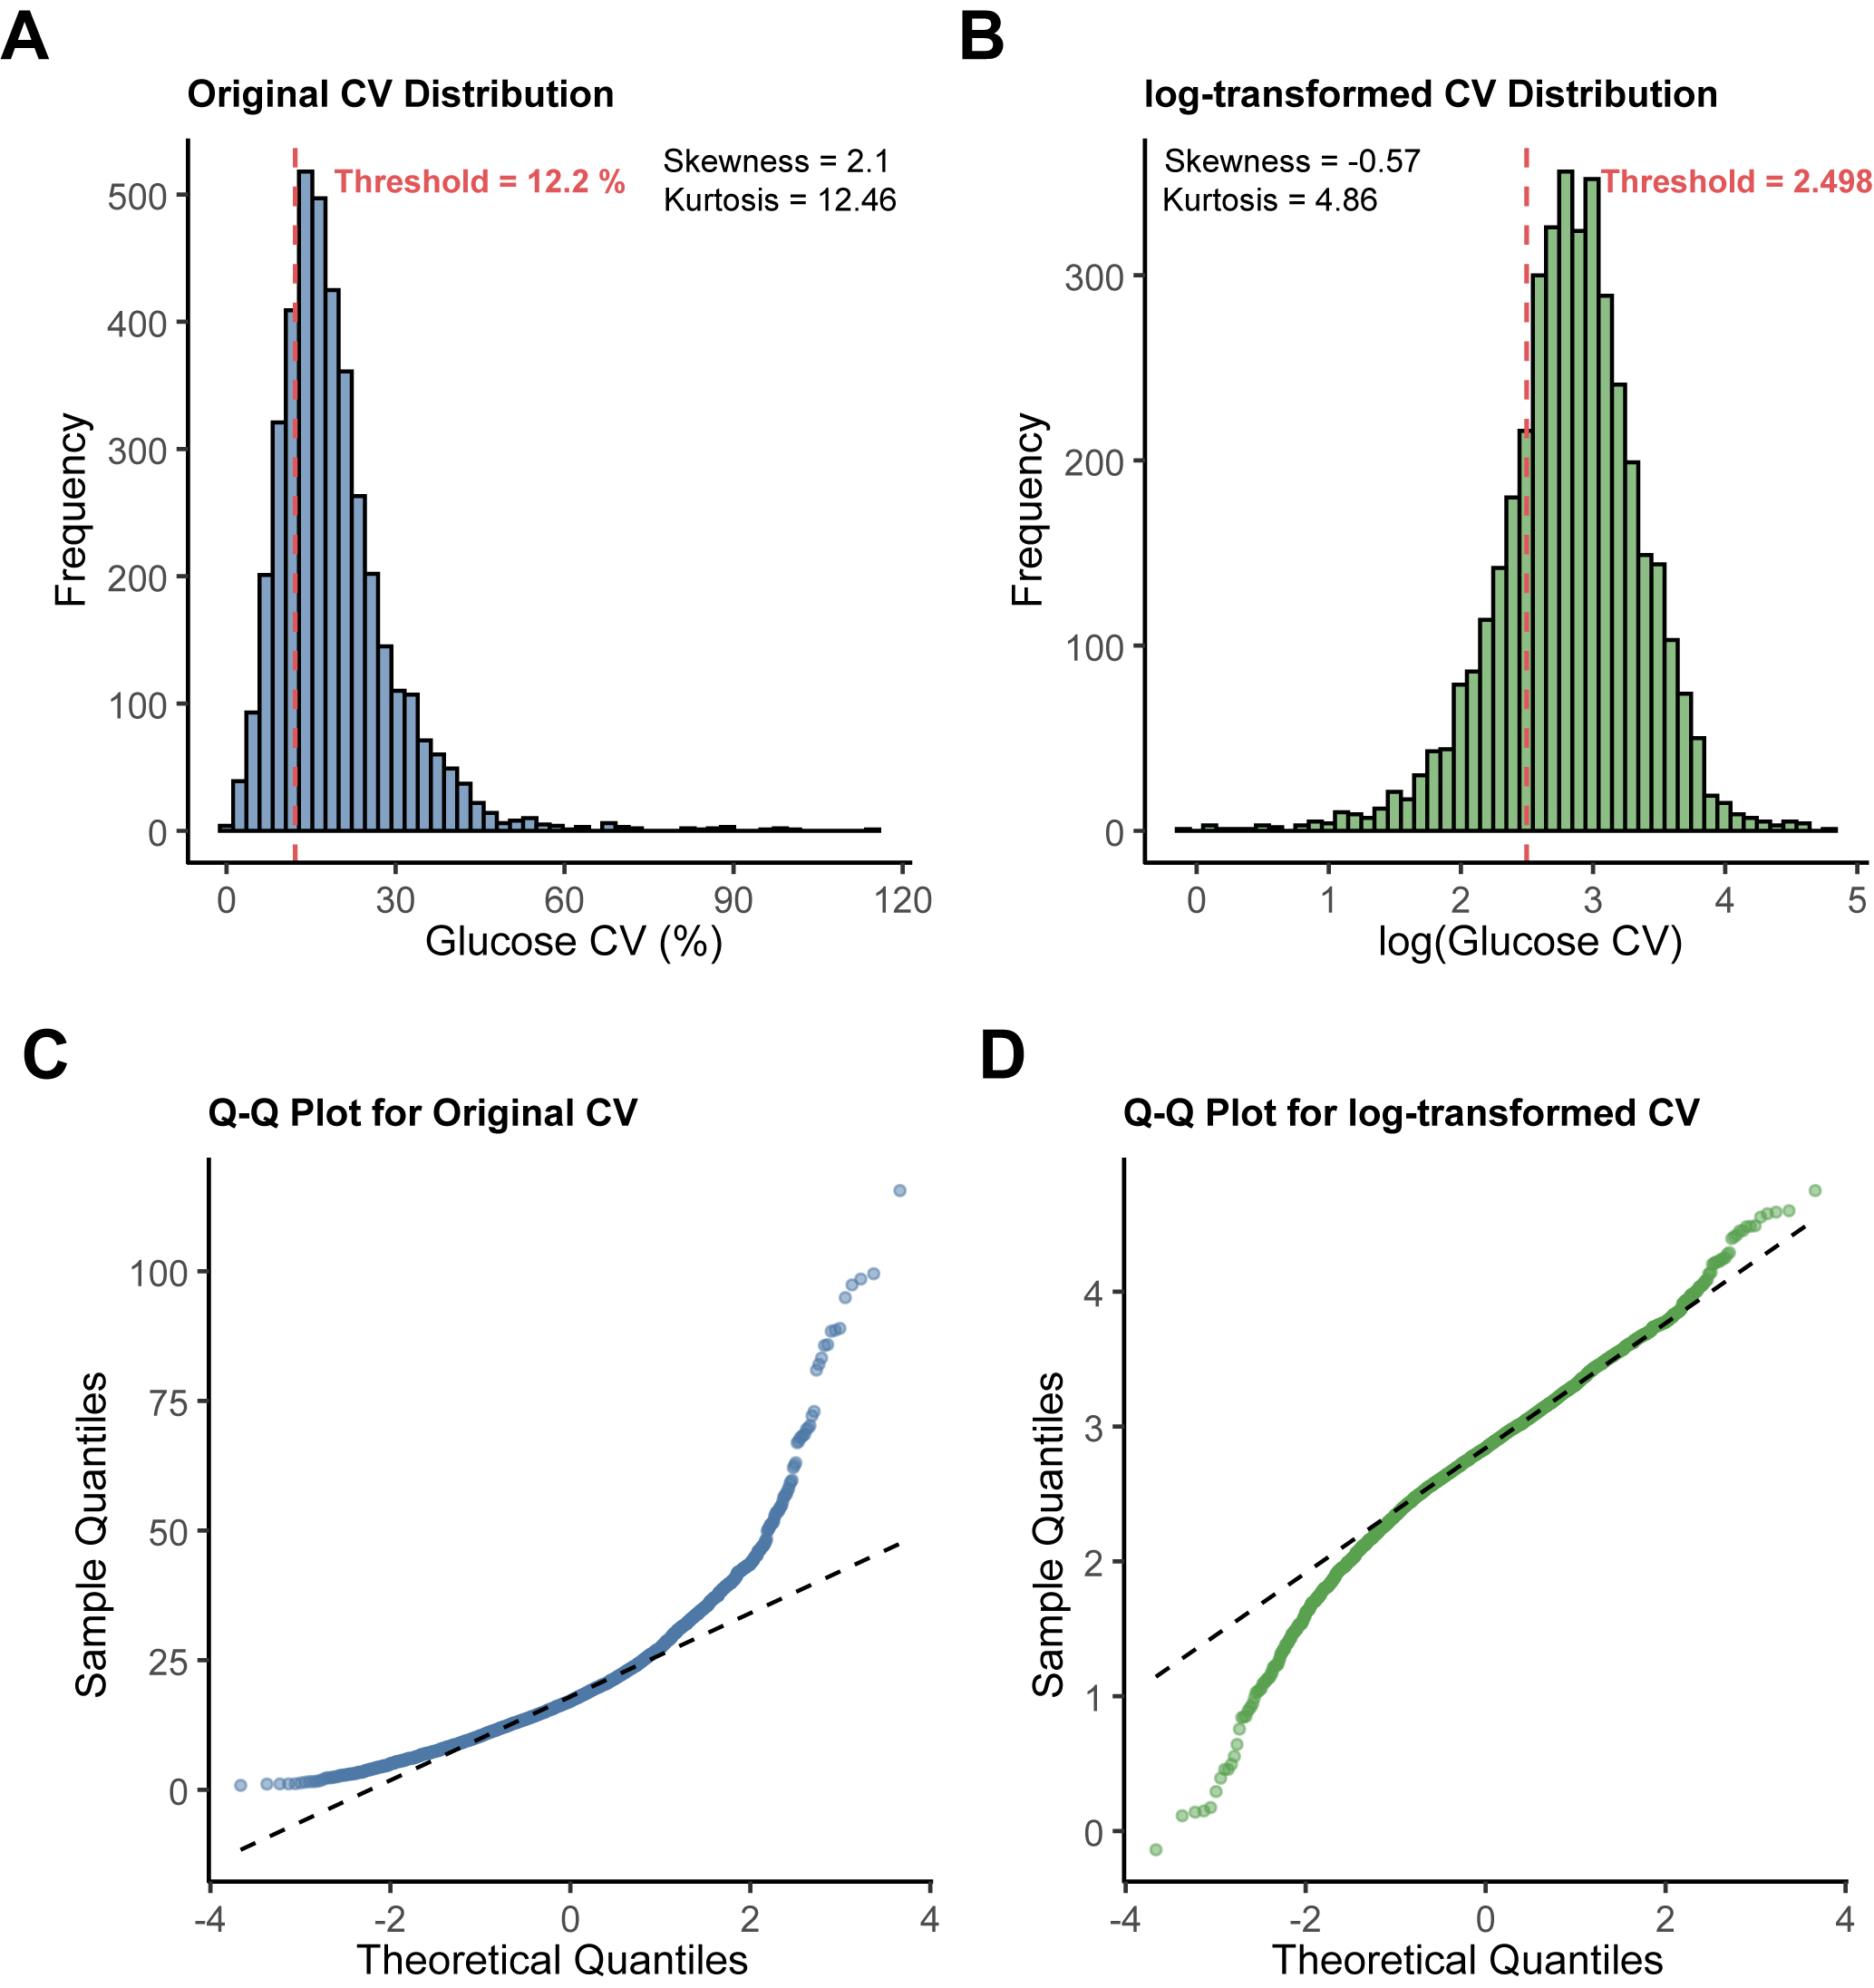


**Figure S1.** **Comparison of the distribution of the Glucose Coefficient of Variation (CV) before and after natural logarithmic transformation.** (A) The histogram of the original CV values, demonstrating a highly right-skewed distribution. (B) The histogram of the log-transformed CV, showing a substantially more symmetric distribution. The red dashed line indicates a CV value of 12.2% (or its log-transformed equivalent, 2.498), a key value examined in subsequent analyses. The inset text provides numerical evidence of the distribution's characteristics, including skewness and kurtosis coefficients. (C) The Quantile-Quantile (Q-Q) plot for the original CV. The data points form a distinct upward-curving arc, deviating significantly from the dashed line of identity, which is characteristic of a right-skewed, heavy-tailed distribution. (D) The Q-Q plot for the log-transformed CV. The data points adhere closely to the line of identity, indicating that the distribution is approximately normal after transformation. This transformation validates the use of log(CV) in subsequent regression models.

**
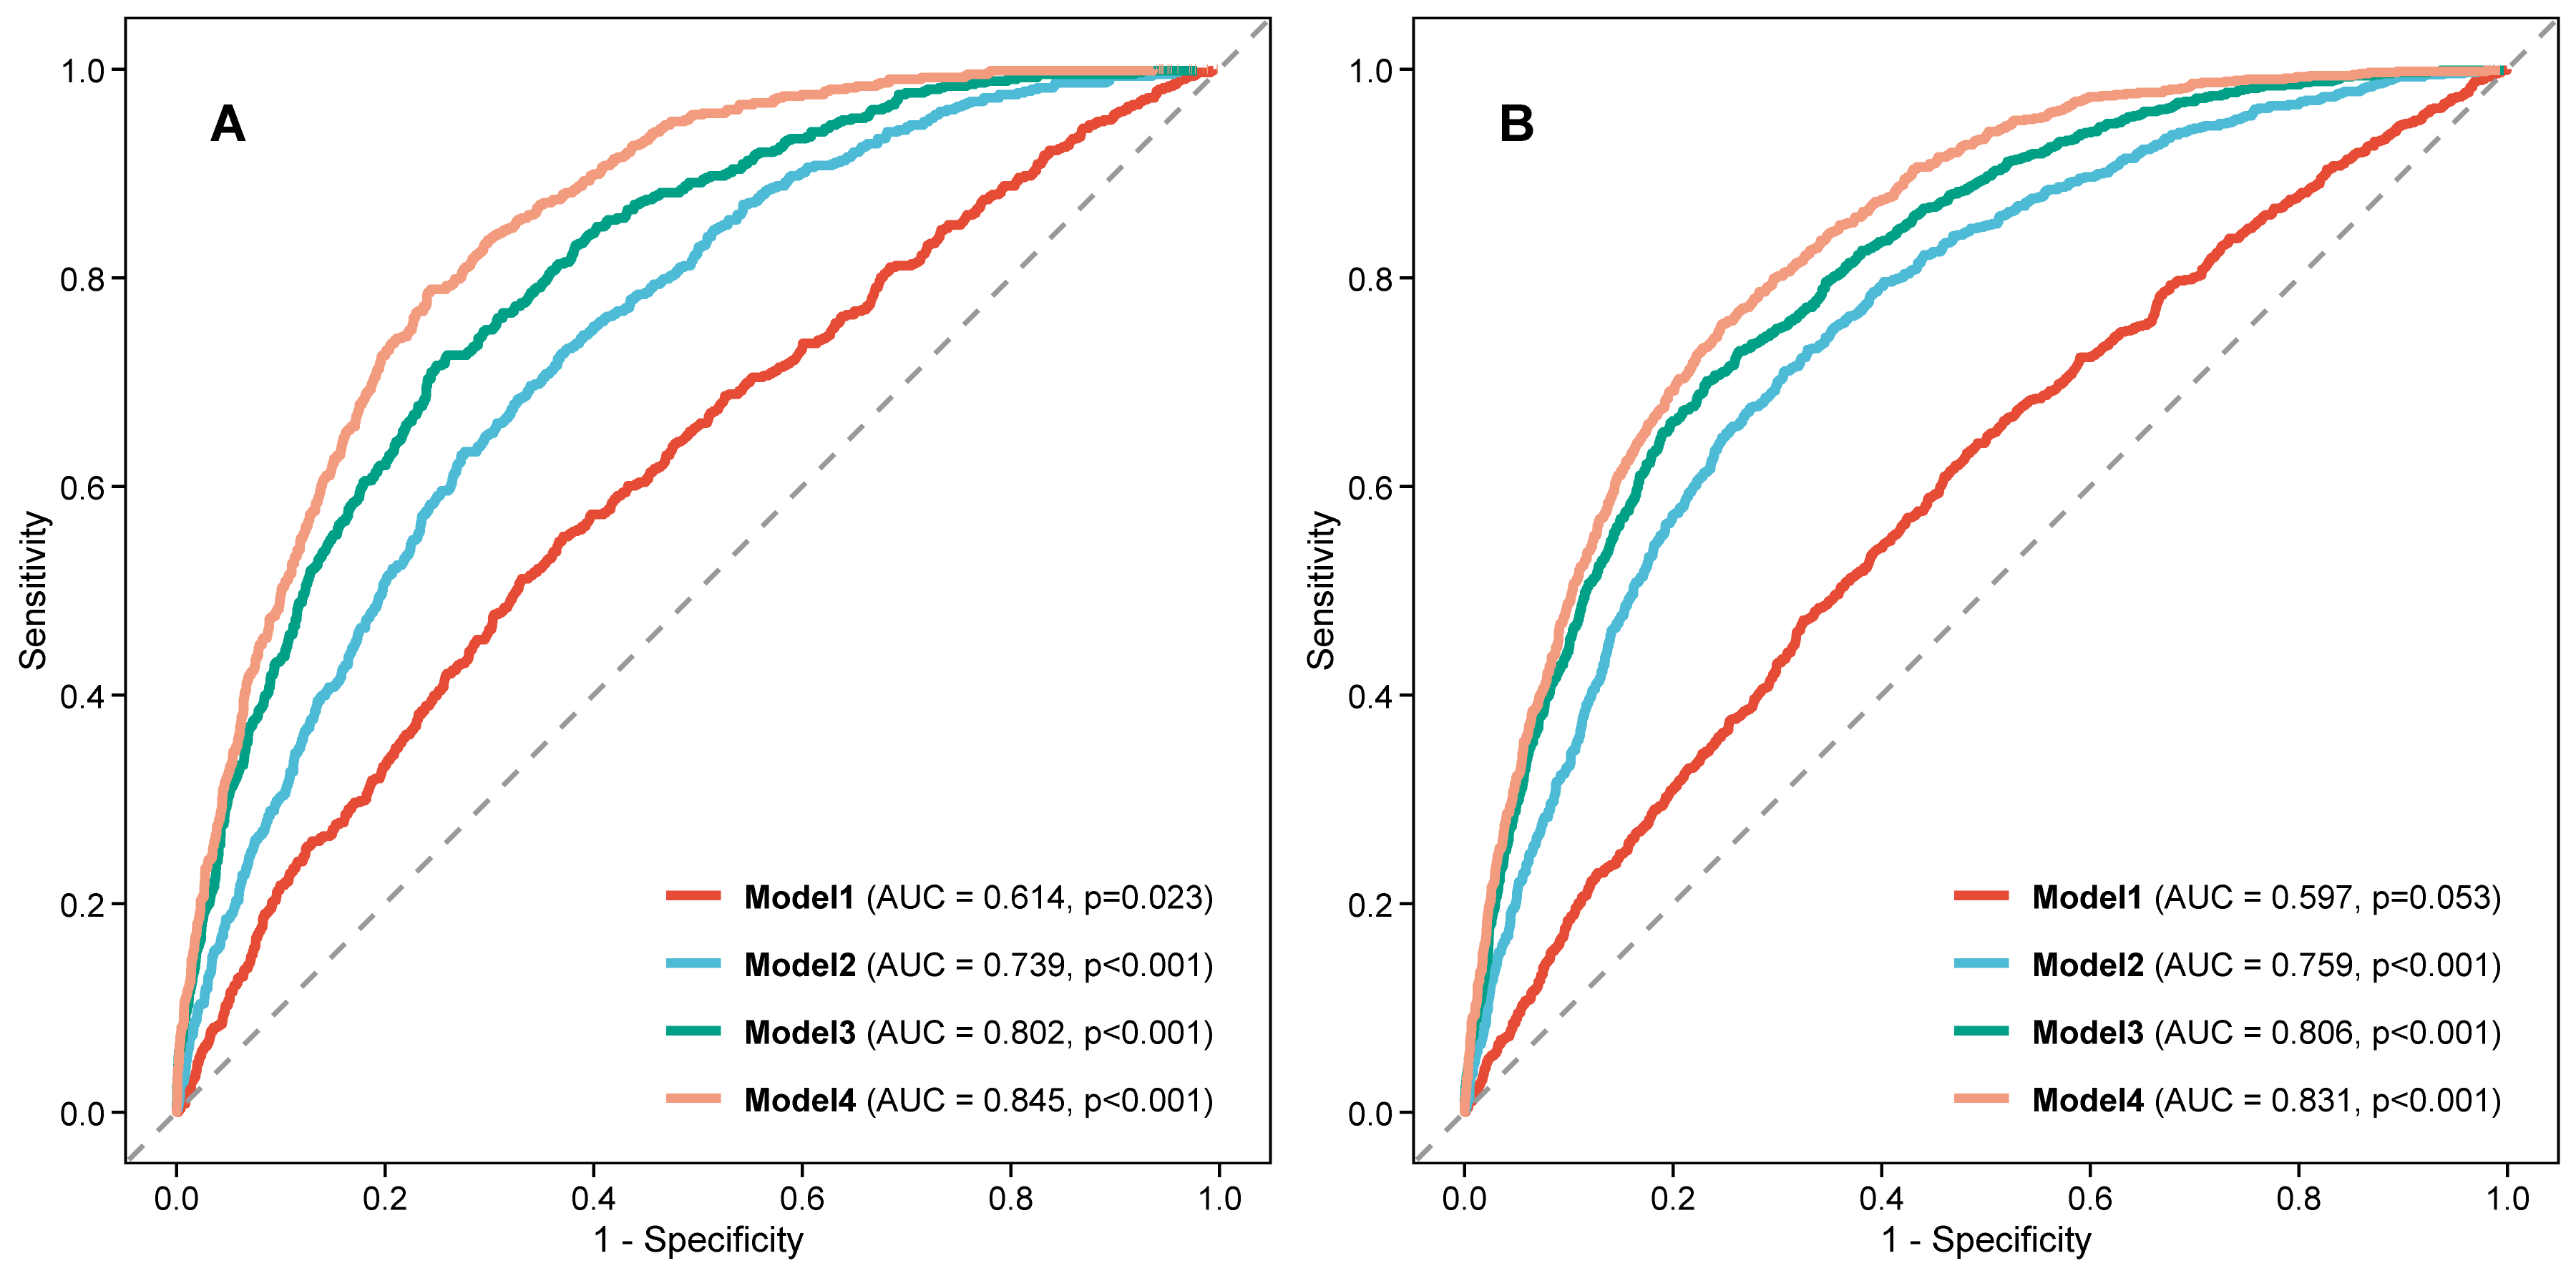
**

**Fig. S2** **Time-dependent receiver operating characteristic (ROC) curves comparing the predictive discrimination of four nested models for 30-day (A) and 1-year (B) all-cause mortality in critically ill trauma patients.** The area under the curve (AUC) quantifies model performance. The models were built with sequential adjustment: Model 1 was unadjusted; Model 2 was adjusted for demographics (age, gender, race); Model 3 further added vital signs (heart rate, systolic/diastolic/mean blood pressure, respiratory rate, body temperature, oxygen saturation), laboratory tests (hemoglobin, white blood cell count, platelets, creatinine, blood urea nitrogen, prothrombin time, activated partial thromboplastin time, international normalized ratio, sodium, potassium, calcium), and comorbidities (diabetes, myocardial infarction, congestive heart failure, cerebrovascular disease, chronic pulmonary disease, renal disease, malignant cancer); Model 4, the fully adjusted model, additionally incorporated severity scores (Glasgow Coma Scale, Injury Severity Score, OASIS, Sequential Organ Failure Assessment), trauma variables (traumatic brain injury, chest/abdominal/spinal/extremity/multiple trauma, trauma mechanism), and treatments (mechanical ventilation, vasoactive drugs, insulin, emergency surgery, blood transfusion).


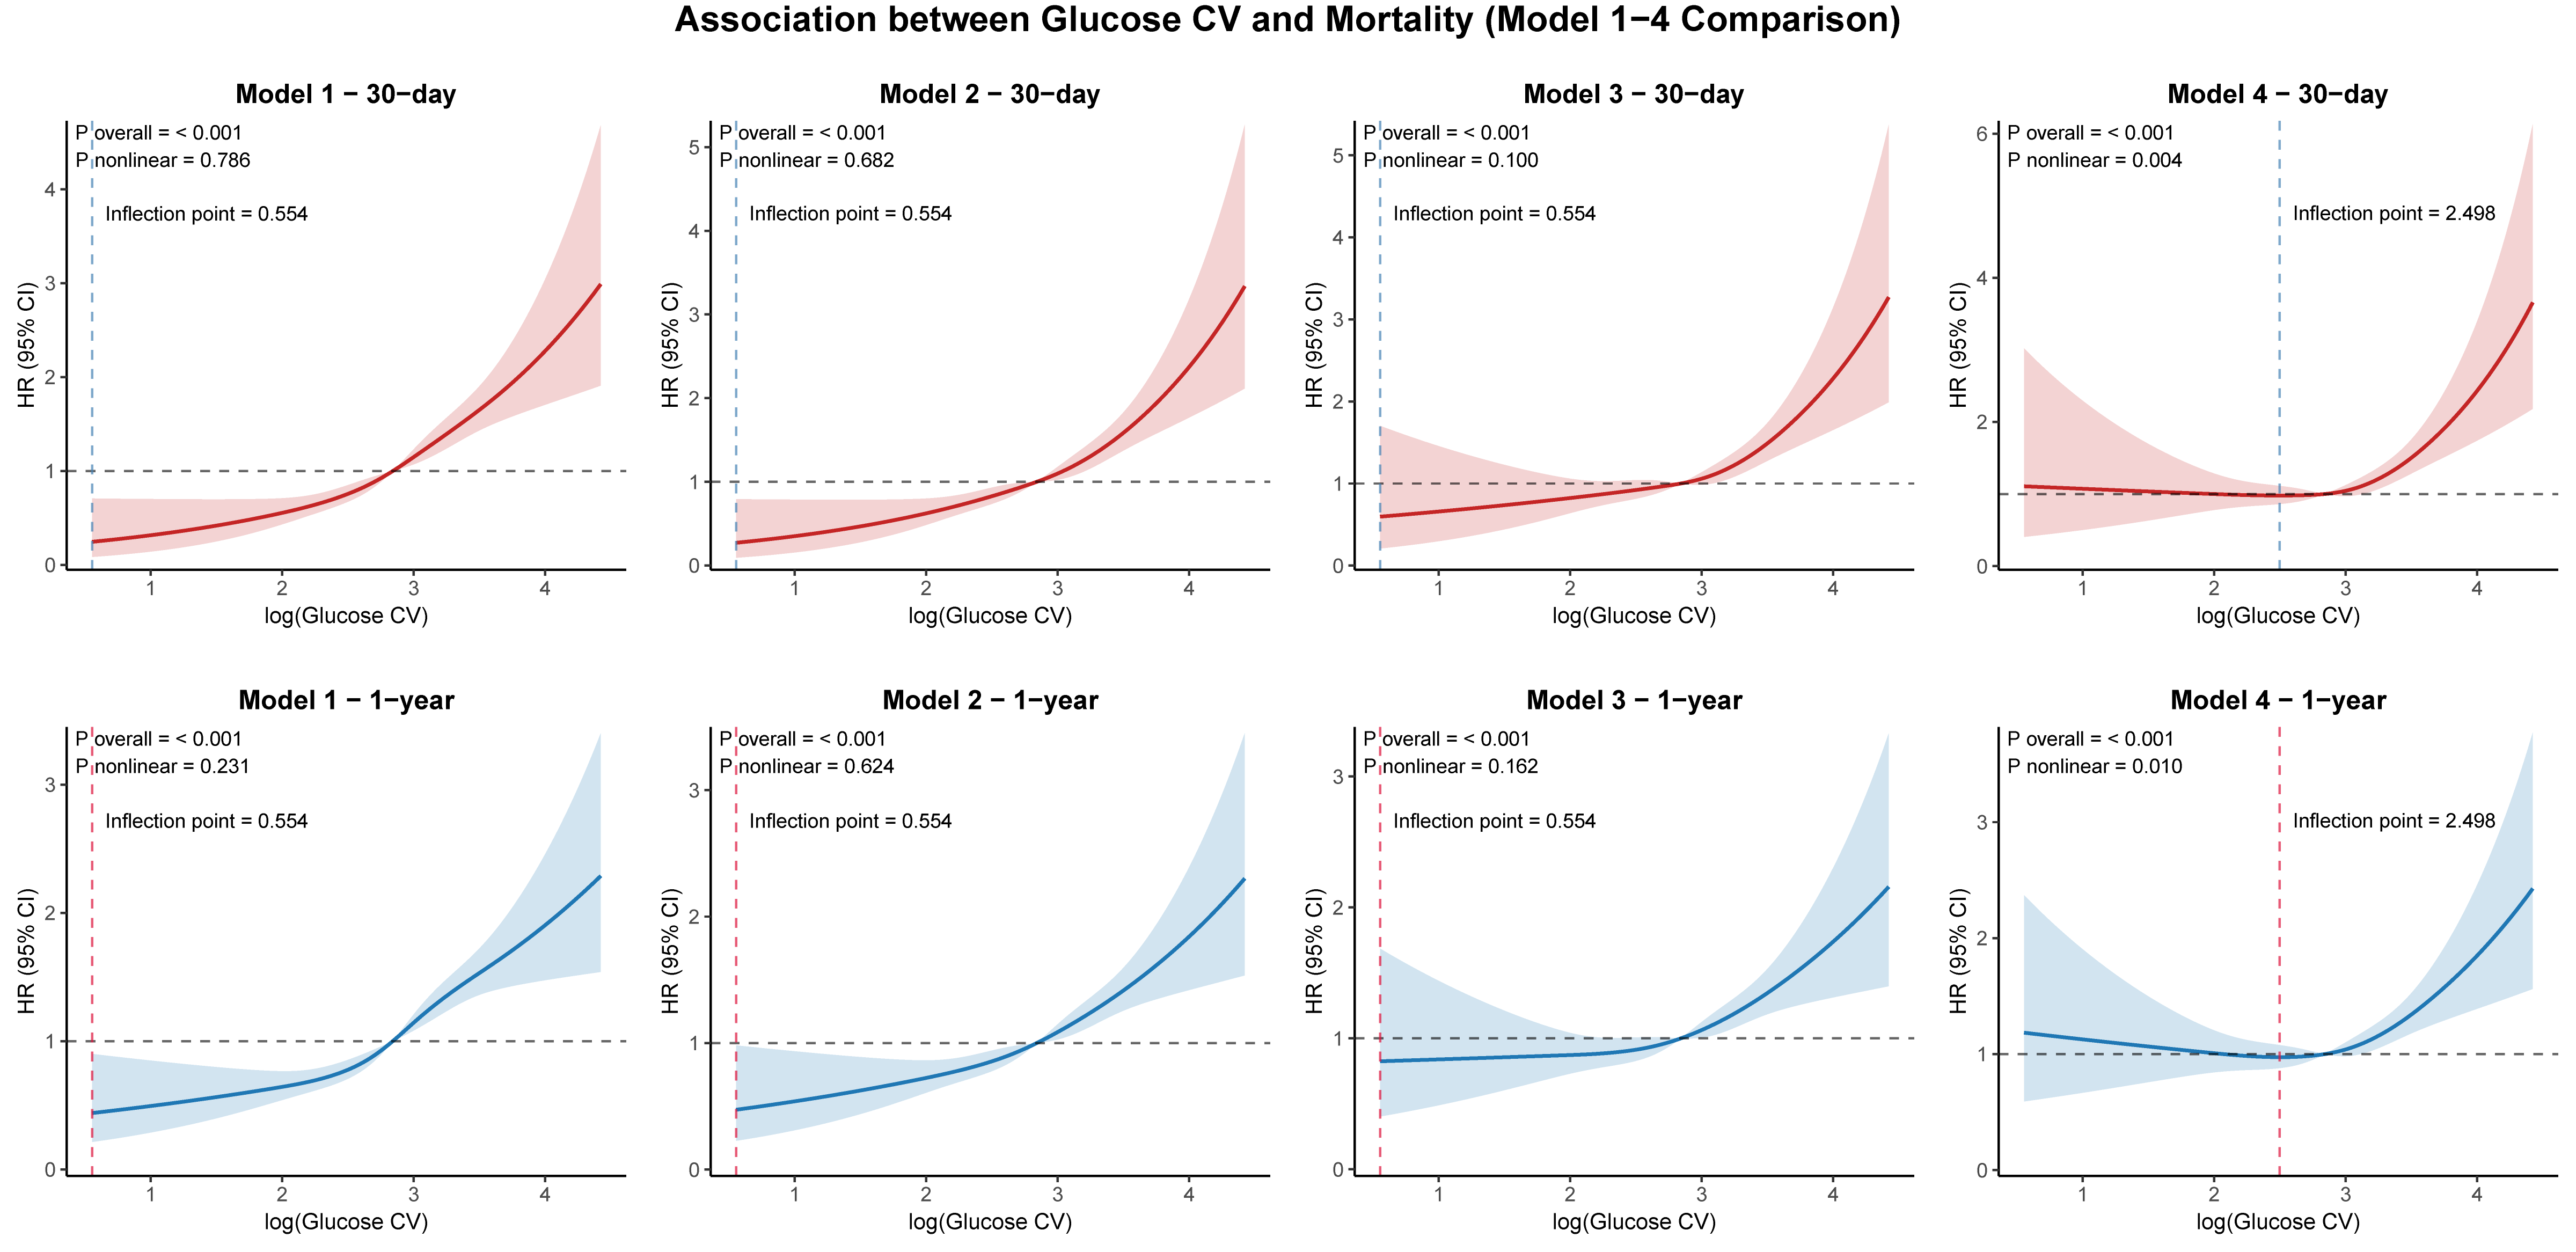


**Fig. S3** **Dose-response association between log(Glucose CV) and mortality in critically ill trauma patients, showing the effect of sequential covariate adjustment.** The figure displays restricted cubic spline curves for the association between the natural logarithm of the Glucose Coefficient of Variation (log(Glucose CV)) and mortality. Each panel represents a different model with progressive covariate adjustment, from Model 1 (unadjusted) to Model 4 (fully adjusted).

**Top Row (Red Curves):** Association with 30-day mortality.

**Bottom Row (Blue Curves):** Association with 1-year mortality.

Solid lines represent the point estimates of the Hazard Ratios (HR), and the shaded areas represent the 95% Confidence Intervals (CI). The *P*-value for overall association and the *P*-value for non-linearity are provided in the top-left corner of each panel. The analysis reveals that the relationship appears linear in the less adjusted models (Models 1-3; *P* for non-linearity > 0.05). However, a statistically significant, J-shaped non-linear association emerges in the fully adjusted Model 4 for both 30-day (P for non-linearity = 0.004) and 1-year mortality (*P* for non-linearity = 0.010). The vertical dashed line in each panel indicates the nadir (point of lowest risk) for that specific model. All spline models were fitted using 4 knots.
